# Supplementary material for: Intercropping Okra and Castor Bean Reduces Recruitment of Oriental Fruit Moth, Grapholita molesta (Lepidoptera: Tortricidae) in a Pear Orchard
Source: MDPI journal article supplement (doi:10.3390/insects14110885), 2023-11-16
Supplement: s1 [file s1]

**Table S3.** Relative amounts of volatile compounds collected from okra fruits.

| Compound                                | Rate time | CAS No.    | Relative content (%) |
|-----------------------------------------|-----------|------------|----------------------|
| 2,2,3-trimethylpentane                  | 12.057    | 564-02-3   | 16.57                |
| 1,2-dichlorobenzene                     | 13.288    | 95-50-1    | 21.05                |
| 1,4-diethylbenzene                      | 16.541    | 105-05-5   | 5.78                 |
| Decamethylcyclopentasiloxane            | 19.093    | 541-02-6   | 0.72                 |
| (3z)-3-hexen-1-yl acetate               | 19.538    | 3681-71-8  | trace                |
| 4-Isopropylbenzyl alcohol               | 19.978    | 536-60-7   | 0.36                 |
| 1-ethenyl-4-ethylbenzene                | 20.025    | 3454/7/7   | 1.45                 |
| Methyl jasmonate                        | 21.233    | 39924-52-2 | 0.78                 |
| 4-ethylacetophenone                     | 23.041    | 937-30-4   | 3.19                 |
| Thymol                                  | 23.476    | 89-83-8    | 6.33                 |
| Unknown                                 | 24.047    | -          | trace                |
| Unknown                                 | 25.577    | -          | 13.18                |
| 1,4-diacetylbenzene                     | 26.166    | 1009-61-6  | 0.67                 |
| 3,3-dimethyl-2-benzofuran-1-one         | 26.443    | 1689-09-4  | 10.82                |
| Unknown                                 | 27.241    | -          | trace                |
| 3,4-dimethylbenzoic acid TMS derivative | 27.993    | -          | 10.27                |
| Tetradecamethyl cycloheptasiloxane      | 28.011    | 107-50-6   | 0.77                 |
| 2,4,6-trimethylbenzyl alcohol           | 28.583    | 4170-90-5  | trace                |
| 4-phenyl-2-butanol TMS derivative       | 28.912    | -          | 4.81                 |
| Unknown                                 | 29.006    | -          | 2.51                 |
| 1-chlorooctadecane                      | 30.437    | 3386-33-2  | 0.67                 |
