# Supplementary material for: Intercropping Okra and Castor Bean Reduces Recruitment of Oriental Fruit Moth, Grapholita molesta (Lepidoptera: Tortricidae) in a Pear Orchard
Source: MDPI journal article supplement (doi:10.3390/insects14110885), 2023-11-16
Supplement: s1 [file s1]

**Table S2.** Relative amounts of volatile compounds collected from okra flowers.

| Compound                       | Rate time | CAS No.    | Relative content (%) |
|--------------------------------|-----------|------------|----------------------|
| Octamethylcyclotetrasiloxane   | 11.875    | 556-67-2   | 5.36                 |
| 2,2,5,5-tetramethylhexane      | 11.976    | 1071-81-4  | 0.56                 |
| 2-ethylbutyl methacrylate      | 13.317    | 5138-86-3  | trace                |
| 1,2-dichlorobenzene            | 16.891    | 95-50-1    | trace                |
| Hexyl acetate                  | 19.143    | 142-92-7   | 1.76                 |
| 4-isopropylbenzyl alcohol      | 19.278    | 536-60-7   | trace                |
| Thymol                         | 19.314    | 89-83-8    | 2.74                 |
| 2-phenylethyl-1,1,2,2-d4-amine | 19.667    | 87620-08-4 | trace                |
| 6-methylhept-5-en-2-one        | 19.763    | 110-93-0   | 20.68                |
| 1,4-diacetylbenzene            | 19.839    | 1009-61-6  | trace                |
| Unknown                        | 20.788    | -          | 0.56                 |
| 1-ethyl-3,5-dimethylbenzene    | 25.29     | 934-74-7   | 4.09                 |
| 1,2-diethylbenzene             | 25.367    | 135-01-3   | 11.67                |
| 4-ethylacetophenone            | 25.552    | 937-30-4   | 9.81                 |
| Unknown                        | 25.663    | -          | 0.45                 |
| 2-ethylhexanol                 | 26.016    | 104-76-7   | 2.45                 |
| 1,3,7-octatriene,3,7-dimethyl  | 26.359    | 502-99-8   | 7.28                 |
| 1-ethyl-3-methyl-benzene       | 26.513    | 620-14-4   | 3.34                 |
