# Supplementary material for: Intercropping Okra and Castor Bean Reduces Recruitment of Oriental Fruit Moth, Grapholita molesta (Lepidoptera: Tortricidae) in a Pear Orchard
Source: MDPI journal article supplement (doi:10.3390/insects14110885), 2023-11-16
Supplement: s1 [file s1]

**Table S5.** Relative amounts of volatile compounds collected from castor bean flowers.

| Compound                                                    | Rate time | CAS No.    | Relative content (%) |
|-------------------------------------------------------------|-----------|------------|----------------------|
| 2,2,3-trimethylpentane                                      | 12.001    | 564-02-3   | 10.50                |
| Dibutyl phthalate                                           | 12.781    | 84-74-2    | 21.03                |
| $\beta$ -damascone                                          | 13.231    | 23726-91-2 | 19.61                |
| Unknown                                                     | 13.542    | -          | 0.98                 |
| 1,4-diethylbenzene                                          | 16.538    | 105-05-5   | 0.49                 |
| dec-1-yne                                                   | 19.244    | 764-93-2   | 4.69                 |
| Butane-2,3-diol                                             | 19.377    | 513-85-9   | 2.51                 |
| 4-phenyl-2-butanol TMS<br>derivative                        | 20.069    | -          | 9.11                 |
| 1-O,2-O,3-O,5-O-tetrakis<br>(trimethylsilyl)-D-xylofuranose | 21.166    | 56271-68-2 | 7.96                 |
| 4-ethylacetophenone                                         | 25.524    | 937-30-4   | trace                |
| Ethyl myristate                                             | 25.899    | 124-06-1   | 1.61                 |
| Cinnamaldehyde                                              | 26.793    | 104-55-2   | 3.66                 |
| Unknown                                                     | 27.877    | -          | 1.03                 |
| 2,6-dimethylundecane                                        | 27.987    | 17301-23-4 | 0.27                 |
| 1-iodoicosane                                               | 28.015    | 34994-81-5 | 3.01                 |
| Decamethylcyclopentasiloxane                                | 29.533    | 541-02-6   | trace                |
| Heptadecane                                                 | 29.729    | 629-78-7   | 11.44                |
| 1-chlorooctadecane                                          | 30.436    | 3386-33-2  | trace                |
