# Supplementary material for: Intercropping Okra and Castor Bean Reduces Recruitment of Oriental Fruit Moth, Grapholita molesta (Lepidoptera: Tortricidae) in a Pear Orchard
Source: MDPI journal article supplement (doi:10.3390/insects14110885), 2023-11-16
Supplement: s1 [file s1]

**Table S1.** Relative amounts of volatile compounds collected from okra leaves.

| Compound                                                 | Rate time | CAS No.    | Relative content (%) |
|----------------------------------------------------------|-----------|------------|----------------------|
| 2,2,3-trimethylpentane                                   | 10.874    | 564-02-3   | 21.57                |
| Octamethylcyclotetrasiloxane                             | 11.982    | 556-67-2   | 2.07                 |
| 1,2-dichlorobenzene                                      | 13.456    | 95-50-1    | 1.56                 |
| Hexestrol                                                | 13.764    | 84-16-2    | 4.97                 |
| Unknown                                                  | 14.489    | -          | 6.13                 |
| 1,4-diethylbenzene                                       | 16.686    | 105-05-5   | trace                |
| 1-nonanal                                                | 17.357    | 124-19-6   | 1.49                 |
| 2,4,6-trimethylbenzyl alcohol                            | 18.055    | 4170-90-5  | 13.34                |
| 1-methyl-3-propan-2-ylbenzene                            | 19.034    | 535-77-3   | 5.62                 |
| Thymol                                                   | 19.285    | 89-83-8    | 11.67                |
| $\alpha$ -copaene                                        | 19.638    | 3856-25-5  | 0.69                 |
| 3-ethylbenzaldehyde                                      | 19.722    | 34246-54-3 | 4.21                 |
| Unknown                                                  | 20.629    | -          | 1.78                 |
| 1-butan-2-yl-2,4-dimethylbenzene                         | 23.015    | 1483-60-9  | 9.11                 |
| 3,3-dimethyl-2-benzofuran-1-one                          | 23.413    | 1689-09-4  | 7.74                 |
| 1-o,2-o,3-o,5-o-tetrakis (trimethylsilyl)-D-xylofuranose | 25.899    | 56271-68-2 | trace                |
