# Supplementary material for: Intercropping Okra and Castor Bean Reduces Recruitment of Oriental Fruit Moth, Grapholita molesta (Lepidoptera: Tortricidae) in a Pear Orchard
Source: MDPI journal article supplement (doi:10.3390/insects14110885), 2023-11-16
Supplement: s1 [file s1]

**Table S4.** Relative amounts of volatile compounds collected from castor bean leaves.

| Compound                                                | Rate time | CAS No.    | Relative content (%) |
|---------------------------------------------------------|-----------|------------|----------------------|
| 2,2,3-trimethylpentane                                  | 11.988    | 564-02-3   | 0.67                 |
| Leaf alcohol                                            | 12.034    | 928-96-1   | 2.89                 |
| 1,2-dichlorobenzene                                     | 12.537    | 95-50-1    | 6.81                 |
| Phenylacetaldehyde                                      | 13.229    | 122-78-1   | 19.01                |
| 1,4-diethylbenzene                                      | 16.543    | 105-05-5   | 0.38                 |
| Decamethylcyclopentasiloxane                            | 19.088    | 541-02-6   | trace                |
| 4-isopropylbenzyl alcohol                               | 19.257    | 536-60-7   | 1.55                 |
| Dimethyl adipate                                        | 19.356    | 627-93-0   | 6.98                 |
| 4-ethylacetophenone                                     | 19.615    | 937-30-4   | trace                |
| Unknown                                                 | 20.017    | -          | trace                |
| Dodecamethylcyclohexasiloxane                           | 21.067    | 540-97-6   | trace                |
| Unknown                                                 | 23.036    | -          | 0.19                 |
| 3,3-dimethyl-2-benzofuran-1-one                         | 23.517    | 1689-09-4  | 4.88                 |
| Dibutyl phthalate                                       | 24.766    | 84-74-2    | 30.69                |
| 3,4-dimethylbenzoic acid TBDMS derivative               | 25.897    | -          | trace                |
| 2,6-Dimethylundecane                                    | 25.997    | 17301-23-4 | 0.69                 |
| Tetradecamethyl cycloheptasiloxane                      | 26.145    | 107-50-6   | trace                |
| Hexadecamethylcyclooctasiloxan                          | 26.308    | 556-68-3   | 5.78                 |
| Heptadecane                                             | 26.577    | 629-78-7   | 2.88                 |
| Unknown                                                 | 27.907    | -          | 0.79                 |
| Unknown                                                 | 28.009    | -          | 4.91                 |
| Unknown                                                 | 28.481    | -          | 0.11                 |
| 4,6-dimethyl-dodecane                                   | 29.015    | -          | trace                |
| Icosane                                                 | 29.661    | 112-95-8   | 0.76                 |
| 1-chlorooctadecane                                      | 29.786    | 3386-33-2  | 1.08                 |
| 1-O-butyl 2-O-(8-methylnonyl) benzene-1,2-dicarboxylate | 31.044    | 42343-36-2 | 7.17                 |
